# Supplementary material for: COVID-19 Prevention and Control Measures in Workplace Settings: A Rapid Review and Meta-Analysis
Source: MDPI journal article supplement (doi:10.3390/ijerph18157847), 2021-07-24
Supplement: s1 [file s1]

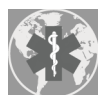

**Supplemental Table S2.** CHARMS Quality Assessment of Modelling Studies

| Domain                                      | Key items                                                                                                                                               | General | Applicabil-<br>ity | Risk<br>of<br>Bias |
|---------------------------------------------|---------------------------------------------------------------------------------------------------------------------------------------------------------|---------|--------------------|--------------------|
| Author                                      | Grassly et al., 2020                                                                                                                                    |         |                    |                    |
| SOURCE OF DATA                              | Source of data (e.g., cohort, case-control, randomized trial participants, or registry data)                                                            | ✓       | ✓                  | X                  |
| PARTICIPANTS                                | Participant eligibility and recruitment method (e.g., consecutive participants, location, number of centers, setting, inclusion and exclusion criteria) | X       | X                  | X                  |
|                                             | Participant description                                                                                                                                 | X       | X                  | X                  |
|                                             | Details of treatments received, if relevant                                                                                                             | ✓       | ✓                  | X                  |
|                                             | Study dates                                                                                                                                             | X       | X                  | X                  |
| OUTCOME(S) TO<br>BE PREDICTED               | Definition and method for measurement of outcome                                                                                                        | ✓       | ✓                  | X                  |
|                                             | Was the same outcome definition (and method for measurement) used in all patients?                                                                      | ✓       | ✓                  | X                  |
|                                             | Type of outcome (e.g., single or combined endpoints)                                                                                                    | ✓       | X                  | X                  |
|                                             | Was the outcome assessed without knowledge of the candidate predictors (i.e., blinded)?                                                                 | X       | X                  | X                  |
|                                             | Were candidate predictors part of the outcome (e.g., in panel or consensus diagnosis)?                                                                  | X       | X                  | X                  |
|                                             | Time of outcome occurrence or summary of duration of follow-up                                                                                          | X       | X                  | X                  |
| CANDIDATE<br>PREDICTORS<br>(OR INDEX TESTS) | Number and type of predictors (e.g., demographics, patient history, physical examination, additional testing, disease characteristics)                  | ✓       | ✓                  | X                  |
|                                             | Definition and method for measurement of candidate predictors                                                                                           | ✓       | ✓                  | X                  |
|                                             | Timing of predictor measurement (e.g., at patient                                                                                                       | ✓       | ✓                  | X                  |

|                   |                                                                                                                                                                                                     |   |   |   |
|-------------------|-----------------------------------------------------------------------------------------------------------------------------------------------------------------------------------------------------|---|---|---|
|                   | presentation, at diagnosis, at treatment initiation)                                                                                                                                                |   |   |   |
|                   | Were predictors assessed blinded for outcome, and for each other (if relevant)?                                                                                                                     | X | X | X |
|                   | Handling of predictors in the modelling (e.g., continuous, linear, non-linear transformations or categorised)                                                                                       | X | X | X |
| SAMPLE SIZE       | Number of participants and number of outcomes/events                                                                                                                                                | X | X | X |
|                   | Number of outcomes/events in relation to the number of candidate predictors (Events Per Variable)                                                                                                   | X | X | X |
| MISSING DATA      | Number of participants with any missing value (include predictors and outcomes)                                                                                                                     | X | X | X |
|                   | Number of participants with missing data for each predictor                                                                                                                                         | X | X | X |
|                   | Handling of missing data (e.g., complete-case analysis, imputation, or other methods)                                                                                                               | X | X | X |
| MODEL DEVELOPMENT | Modelling method (e.g., logistic, survival, neural network, or machine learning techniques)                                                                                                         | ✓ | ✓ | X |
|                   | Modelling assumptions satisfied                                                                                                                                                                     | ✓ | ✓ | X |
|                   | Method for selection of predictors <b>for inclusion</b> in multivariable modelling (e.g., all candidate predictors, pre-selection based on unadjusted association with the outcome)                 | ✓ | ✓ | X |
|                   | Method for selection of predictors <b>during multivariable modelling</b> (e.g., full model approach, backward or forward selection) and criteria used (e.g., p-value, Akaike Information Criterion) | ✓ | ✓ | X |
|                   | Shrinkage of predictor weights or regression coefficients (e.g., no shrinkage, uniform shrinkage, penalized estimation)                                                                             | X | X | X |
| MODEL PERFORMANCE | Calibration (calibration plot, calibration slope, Hosmer-Lemeshow test) and Discrimination (C-statistic, D-statistic, log-rank) measures with confidence inter-                                     | X | X | X |

|                                      |                                                                                                                                                                                                                                                                   |   |   |   |
|--------------------------------------|-------------------------------------------------------------------------------------------------------------------------------------------------------------------------------------------------------------------------------------------------------------------|---|---|---|
|                                      | vals                                                                                                                                                                                                                                                              |   |   |   |
|                                      | Classification measures (e.g., sensitivity, specificity, predictive values, net reclassification improvement) and whether a-priori cut points were used                                                                                                           | ✓ | X | X |
| <b>MODEL EVALUATION</b>              | Method used for testing model performance: development dataset only (random split of data, resampling methods e.g. bootstrap or cross-validation, none) or separate external validation (e.g. temporal, geographical, different setting, different investigators) | ✓ | ✓ | X |
|                                      | In case of poor validation, whether model was adjusted or updated (e.g., intercept recalibrated, predictor effects adjusted, or new predictors added)                                                                                                             | X | X | X |
| <b>RESULTS</b>                       | Final and other multivariable models (e.g., basic, extended, simplified) presented, including predictor weights or regression coefficients, intercept, baseline survival, model performance measures (with standard errors or confidence intervals)               | X | X | X |
|                                      | Any alternative presentation of the final prediction models, e.g., sum score, nomogram, score chart, predictions for specific risk subgroups with performance                                                                                                     | ✓ | ✓ | X |
|                                      | Comparison of the distribution of predictors (including missing data) for development and validation datasets                                                                                                                                                     | X | X | X |
| <b>INTERPRETATION AND DISCUSSION</b> | Interpretation of presented models (confirmatory, i.e., model useful for practice versus exploratory, i.e., more research needed)                                                                                                                                 | ✓ | ✓ | X |
|                                      | Comparison with other studies, discussion of generalizability, strengths, and limitations.                                                                                                                                                                        | ✓ | ✓ | X |

| Domain | Key items | General | Applicabil- | Risk |
|--------|-----------|---------|-------------|------|
|--------|-----------|---------|-------------|------|

|                                       |                                                                                                                                                         |   | ity | of Bias |
|---------------------------------------|---------------------------------------------------------------------------------------------------------------------------------------------------------|---|-----|---------|
| Author                                | Qiu et al., 2020                                                                                                                                        |   |     |         |
| SOURCE OF DATA                        | Source of data (e.g., cohort, case-control, randomized trial participants, or registry data)                                                            | X | X   | X       |
| PARTICIPANTS                          | Participant eligibility and recruitment method (e.g., consecutive participants, location, number of centers, setting, inclusion and exclusion criteria) | X | X   | X       |
|                                       | Participant description                                                                                                                                 | X | X   | X       |
|                                       | Details of treatments received, if relevant                                                                                                             | X | X   | X       |
|                                       | Study dates                                                                                                                                             | X | X   | X       |
| OUTCOME(S) TO BE PREDICTED            | Definition and method for measurement of outcome                                                                                                        | ✓ | ✓   | X       |
|                                       | Was the same outcome definition (and method for measurement) used in all patients?                                                                      | ✓ | ✓   | X       |
|                                       | Type of outcome (e.g., single or combined endpoints)                                                                                                    | ✓ | ✓   | X       |
|                                       | Was the outcome assessed without knowledge of the candidate predictors (i.e., blinded)?                                                                 | X | X   | X       |
|                                       | Were candidate predictors part of the outcome (e.g., in panel or consensus diagnosis)?                                                                  | ✓ | ✓   | X       |
|                                       | Time of outcome occurrence or summary of duration of follow-up                                                                                          | X | X   | X       |
| CANDIDATE PREDICTORS (OR INDEX TESTS) | Number and type of predictors (e.g., demographics, patient history, physical examination, additional testing, disease characteristics)                  | ✓ | ✓   | X       |
|                                       | Definition and method for measurement of candidate predictors                                                                                           | ✓ | ✓   | X       |
|                                       | Timing of predictor measurement (e.g., at patient presentation, at diagnosis, at treatment initiation)                                                  | ✓ | ✓   | X       |
|                                       | Were predictors assessed blinded for outcome, and for each other (if relevant)?                                                                         | X | X   | X       |

|                   |                                                                                                                                                                                                     |   |   |   |
|-------------------|-----------------------------------------------------------------------------------------------------------------------------------------------------------------------------------------------------|---|---|---|
|                   | Handling of predictors in the modelling (e.g., continuous, linear, non-linear transformations or categorised)                                                                                       | ✓ | ✓ | X |
| SAMPLE SIZE       | Number of participants and number of outcomes/events                                                                                                                                                | X | X | X |
|                   | Number of outcomes/events in relation to the number of candidate predictors (Events Per Variable)                                                                                                   | X | X | X |
| MISSING DATA      | Number of participants with any missing value (include predictors and outcomes)                                                                                                                     | X | X | X |
|                   | Number of participants with missing data for each predictor                                                                                                                                         | X | X | X |
|                   | Handling of missing data (e.g., complete-case analysis, imputation, or other methods)                                                                                                               | X | X | X |
| MODEL DEVELOPMENT | Modelling method (e.g., logistic, survival, neural network, or machine learning techniques)                                                                                                         | ✓ | ✓ | X |
|                   | Modelling assumptions satisfied                                                                                                                                                                     | ✓ | ✓ | X |
|                   | Method for selection of predictors <b>for inclusion</b> in multivariable modelling (e.g., all candidate predictors, pre-selection based on unadjusted association with the outcome)                 | ✓ | ✓ | X |
|                   | Method for selection of predictors <b>during multivariable modelling</b> (e.g., full model approach, backward or forward selection) and criteria used (e.g., p-value, Akaike Information Criterion) | ✓ | ✓ | X |
|                   | Shrinkage of predictor weights or regression coefficients (e.g., no shrinkage, uniform shrinkage, penalized estimation)                                                                             | X | X | X |
| MODEL PERFORMANCE | Calibration (calibration plot, calibration slope, Hosmer-Lemeshow test) and Discrimination (C-statistic, D-statistic, log-rank) measures with confidence intervals                                  | X | X | X |
|                   | Classification measures (e.g., sensitivity, specificity, predictive values, net reclassification improvement)                                                                                       | X | X | X |

|                                      |                                                                                                                                                                                                                                                                   |   |   |   |
|--------------------------------------|-------------------------------------------------------------------------------------------------------------------------------------------------------------------------------------------------------------------------------------------------------------------|---|---|---|
|                                      | and whether a-priori cut points were used                                                                                                                                                                                                                         |   |   |   |
| <b>MODEL EVALUATION</b>              | Method used for testing model performance: development dataset only (random split of data, resampling methods e.g. bootstrap or cross-validation, none) or separate external validation (e.g. temporal, geographical, different setting, different investigators) | ✓ | ✓ | X |
|                                      | In case of poor validation, whether model was adjusted or updated (e.g., intercept recalibrated, predictor effects adjusted, or new predictors added)                                                                                                             | X | X | X |
| <b>RESULTS</b>                       | Final and other multivariable models (e.g., basic, extended, simplified) presented, including predictor weights or regression coefficients, intercept, baseline survival, model performance measures (with standard errors or confidence intervals)               | ✓ | ✓ | X |
|                                      | Any alternative presentation of the final prediction models, e.g., sum score, nomogram, score chart, predictions for specific risk subgroups with performance                                                                                                     | ✓ | ✓ | X |
|                                      | Comparison of the distribution of predictors (including missing data) for development and validation datasets                                                                                                                                                     | X | X | X |
| <b>INTERPRETATION AND DISCUSSION</b> | Interpretation of presented models (confirmatory, i.e., model useful for practice versus exploratory, i.e., more research needed)                                                                                                                                 | ✓ | ✓ | X |
|                                      | Comparison with other studies, discussion of generalizability, strengths, and limitations.                                                                                                                                                                        | ✓ | ✓ | X |

| Domain | Key items         | General | Applicability | Risk of Bias |
|--------|-------------------|---------|---------------|--------------|
| Author | Chin et al., 2020 |         |               |              |

|                                              |                                                                                                                                                         |   |   |   |
|----------------------------------------------|---------------------------------------------------------------------------------------------------------------------------------------------------------|---|---|---|
| <b>SOURCE OF DATA</b>                        | Source of data (e.g., cohort, case-control, randomized trial participants, or registry data)                                                            | X | X | X |
| <b>PARTICIPANTS</b>                          | Participant eligibility and recruitment method (e.g., consecutive participants, location, number of centers, setting, inclusion and exclusion criteria) | ✓ | ✓ | X |
|                                              | Participant description                                                                                                                                 | ✓ | ✓ | X |
|                                              | Details of treatments received, if relevant                                                                                                             | X | X | X |
|                                              | Study dates                                                                                                                                             | X | X | X |
| <b>OUTCOME(S) TO BE PREDICTED</b>            | Definition and method for measurement of outcome                                                                                                        | ✓ | ✓ | X |
|                                              | Was the same outcome definition (and method for measurement) used in all patients?                                                                      | ✓ | ✓ | X |
|                                              | Type of outcome (e.g., single or combined endpoints)                                                                                                    | ✓ | ✓ | X |
|                                              | Was the outcome assessed without knowledge of the candidate predictors (i.e., blinded)?                                                                 | X | X | X |
|                                              | Were candidate predictors part of the outcome (e.g., in panel or consensus diagnosis)?                                                                  | ✓ | ✓ | X |
|                                              | Time of outcome occurrence or summary of duration of follow-up                                                                                          | ✓ | ✓ | X |
| <b>CANDIDATE PREDICTORS (OR INDEX TESTS)</b> | Number and type of predictors (e.g., demographics, patient history, physical examination, additional testing, disease characteristics)                  | ✓ | ✓ | X |
|                                              | Definition and method for measurement of candidate predictors                                                                                           | ✓ | ✓ | X |
|                                              | Timing of predictor measurement (e.g., at patient presentation, at diagnosis, at treatment initiation)                                                  | ✓ | ✓ | X |
|                                              | Were predictors assessed blinded for outcome, and for each other (if relevant)?                                                                         | X | X | X |
|                                              | Handling of predictors in the modelling (e.g., continuous, linear, non-linear transformations or categorised)                                           | ✓ | ✓ | X |
| <b>SAMPLE SIZE</b>                           | Number of participants and number of out-                                                                                                               | ✓ | ✓ | X |

|                   |                                                                                                                                                                                                     |   |   |   |
|-------------------|-----------------------------------------------------------------------------------------------------------------------------------------------------------------------------------------------------|---|---|---|
|                   | comes/events                                                                                                                                                                                        |   |   |   |
|                   | Number of outcomes/events in relation to the number of candidate predictors (Events Per Variable)                                                                                                   | X | X | X |
| MISSING DATA      | Number of participants with any missing value (include predictors and outcomes)                                                                                                                     | X | X | X |
|                   | Number of participants with missing data for each predictor                                                                                                                                         | X | X | X |
|                   | Handling of missing data (e.g., complete-case analysis, imputation, or other methods)                                                                                                               | X | X | X |
| MODEL DEVELOPMENT | Modelling method (e.g., logistic, survival, neural network, or machine learning techniques)                                                                                                         | ✓ | ✓ | X |
|                   | Modelling assumptions satisfied                                                                                                                                                                     | ✓ | ✓ | X |
|                   | Method for selection of predictors <b>for inclusion</b> in multivariable modelling (e.g., all candidate predictors, pre-selection based on unadjusted association with the outcome)                 | X | X | X |
|                   | Method for selection of predictors <b>during multivariable modelling</b> (e.g., full model approach, backward or forward selection) and criteria used (e.g., p-value, Akaike Information Criterion) | X | X | X |
|                   | Shrinkage of predictor weights or regression coefficients (e.g., no shrinkage, uniform shrinkage, penalized estimation)                                                                             | X | X | X |
| MODEL PERFORMANCE | Calibration (calibration plot, calibration slope, Hosmer-Lemeshow test) and Discrimination (C-statistic, D-statistic, log-rank) measures with confidence intervals                                  | ✓ | ✓ | X |
|                   | Classification measures (e.g., sensitivity, specificity, predictive values, net reclassification improvement) and whether a-priori cut points were used                                             | ✓ | ✓ | X |
| MODEL             | Method used for testing model performance: development dataset only (random split of data, resampling methods e.g. bootstrap or cross-validation, none) or                                          | X | X | X |



|                                      |                                                                                                                                                                                                                                                     |   |   |   |
|--------------------------------------|-----------------------------------------------------------------------------------------------------------------------------------------------------------------------------------------------------------------------------------------------------|---|---|---|
| <b>EVALUATION</b>                    | separate external validation (e.g. temporal, geographical, different setting, different investigators)                                                                                                                                              |   |   |   |
|                                      | In case of poor validation, whether model was adjusted or updated (e.g., intercept recalibrated, predictor effects adjusted, or new predictors added)                                                                                               | X | X | X |
| <b>RESULTS</b>                       | Final and other multivariable models (e.g., basic, extended, simplified) presented, including predictor weights or regression coefficients, intercept, baseline survival, model performance measures (with standard errors or confidence intervals) | ✓ | ✓ | X |
|                                      | Any alternative presentation of the final prediction models, e.g., sum score, nomogram, score chart, predictions for specific risk subgroups with performance                                                                                       | X | X | X |
|                                      | Comparison of the distribution of predictors (including missing data) for development and validation datasets                                                                                                                                       | X | X | X |
| <b>INTERPRETATION AND DISCUSSION</b> | Interpretation of presented models (confirmatory, i.e., model useful for practice versus exploratory, i.e., more research needed)                                                                                                                   | ✓ | ✓ | X |
|                                      | Comparison with other studies, discussion of generalizability, strengths, and limitations.                                                                                                                                                          | ✓ | ✓ | X |

| Domain                | Key items                                                                                                    | General | Applicability | Risk of Bias |
|-----------------------|--------------------------------------------------------------------------------------------------------------|---------|---------------|--------------|
| Author                | Kucharski et al., 2020                                                                                       |         |               |              |
| <b>SOURCE OF DATA</b> | Source of data (e.g., cohort, case-control, randomized trial participants, or registry data)                 | ✓       | ✓             | X            |
| <b>PARTICIPANTS</b>   | Participant eligibility and recruitment method (e.g., consecutive participants, location, number of centers, | ✓       | ✓             | X            |

|                                              |                                                                                                                                        |   |   |   |
|----------------------------------------------|----------------------------------------------------------------------------------------------------------------------------------------|---|---|---|
|                                              | setting, inclusion and exclusion criteria)                                                                                             |   |   |   |
|                                              | Participant description                                                                                                                | ✓ | ✓ | X |
|                                              | Details of treatments received, if relevant                                                                                            | ✓ | ✓ | X |
|                                              | Study dates                                                                                                                            | X | X | X |
| <b>OUTCOME(S) TO BE PREDICTED</b>            | Definition and method for measurement of outcome                                                                                       | ✓ | ✓ | X |
|                                              | Was the same outcome definition (and method for measurement) used in all patients?                                                     | ✓ | ✓ | X |
|                                              | Type of outcome (e.g., single or combined endpoints)                                                                                   | ✓ | ✓ | X |
|                                              | Was the outcome assessed without knowledge of the candidate predictors (i.e., blinded)?                                                | X | X | X |
|                                              | Were candidate predictors part of the outcome (e.g., in panel or consensus diagnosis)?                                                 | ✓ | ✓ | X |
|                                              | Time of outcome occurrence or summary of duration of follow-up                                                                         | X | X | X |
| <b>CANDIDATE PREDICTORS (OR INDEX TESTS)</b> | Number and type of predictors (e.g., demographics, patient history, physical examination, additional testing, disease characteristics) | ✓ | ✓ | X |
|                                              | Definition and method for measurement of candidate predictors                                                                          | ✓ | ✓ | X |
|                                              | Timing of predictor measurement (e.g., at patient presentation, at diagnosis, at treatment initiation)                                 | X | X | X |
|                                              | Were predictors assessed blinded for outcome, and for each other (if relevant)?                                                        | X | X | X |
|                                              | Handling of predictors in the modelling (e.g., continuous, linear, non-linear transformations or categorised)                          | ✓ | ✓ | X |
| <b>SAMPLE SIZE</b>                           | Number of participants and number of outcomes/events                                                                                   | ✓ | ✓ | X |
|                                              | Number of outcomes/events in relation to the number of candidate predictors (Events Per Variable)                                      | ✓ | ✓ | X |
| <b>MISSING DATA</b>                          | Number of participants with any missing value (in-                                                                                     | X | X | X |

|                          |                                                                                                                                                                                                                                                                   |   |   |   |
|--------------------------|-------------------------------------------------------------------------------------------------------------------------------------------------------------------------------------------------------------------------------------------------------------------|---|---|---|
|                          | clude predictors and outcomes)                                                                                                                                                                                                                                    |   |   |   |
|                          | Number of participants with missing data for each predictor                                                                                                                                                                                                       | X | X | X |
|                          | Handling of missing data (e.g., complete-case analysis, imputation, or other methods)                                                                                                                                                                             | X | X | X |
| <b>MODEL DEVELOPMENT</b> | Modelling method (e.g., logistic, survival, neural network, or machine learning techniques)                                                                                                                                                                       | ✓ | ✓ | X |
|                          | Modelling assumptions satisfied                                                                                                                                                                                                                                   | ✓ | ✓ | X |
|                          | Method for selection of predictors <b>for inclusion</b> in multivariable modelling (e.g., all candidate predictors, pre-selection based on unadjusted association with the outcome)                                                                               | X | X | X |
|                          | Method for selection of predictors <b>during multivariable modelling</b> (e.g., full model approach, backward or forward selection) and criteria used (e.g., p-value, Akaike Information Criterion)                                                               | X | X | X |
| <b>MODEL PERFORMANCE</b> | Shrinkage of predictor weights or regression coefficients (e.g., no shrinkage, uniform shrinkage, penalized estimation)                                                                                                                                           | X | X | X |
|                          | Calibration (calibration plot, calibration slope, Hosmer-Lemeshow test) and Discrimination (C-statistic, D-statistic, log-rank) measures with confidence intervals                                                                                                | X | X | X |
| <b>MODEL EVALUATION</b>  | Classification measures (e.g., sensitivity, specificity, predictive values, net reclassification improvement) and whether a-priori cut points were used                                                                                                           | X | X | X |
|                          | Method used for testing model performance: development dataset only (random split of data, resampling methods e.g. bootstrap or cross-validation, none) or separate external validation (e.g. temporal, geographical, different setting, different investigators) | X | X | X |

|                               |                                                                                                                                                                                                                                                     |   |   |   |
|-------------------------------|-----------------------------------------------------------------------------------------------------------------------------------------------------------------------------------------------------------------------------------------------------|---|---|---|
|                               | In case of poor validation, whether model was adjusted or updated (e.g., intercept recalibrated, predictor effects adjusted, or new predictors added)                                                                                               | ✓ | ✓ | X |
| RESULTS                       | Final and other multivariable models (e.g., basic, extended, simplified) presented, including predictor weights or regression coefficients, intercept, baseline survival, model performance measures (with standard errors or confidence intervals) | ✓ | ✓ | X |
|                               | Any alternative presentation of the final prediction models, e.g., sum score, nomogram, score chart, predictions for specific risk subgroups with performance                                                                                       | ✓ | ✓ | X |
|                               | Comparison of the distribution of predictors (including missing data) for development and validation datasets                                                                                                                                       | X | X | X |
| INTERPRETATION AND DISCUSSION | Interpretation of presented models (confirmatory, i.e., model useful for practice versus exploratory, i.e., more research needed)                                                                                                                   | ✓ | ✓ | X |
|                               | Comparison with other studies, discussion of generalizability, strengths, and limitations.                                                                                                                                                          | ✓ | ✓ | X |

| Domain         | Key items                                                                                                                                               | General | Applicability | Risk of Bias |
|----------------|---------------------------------------------------------------------------------------------------------------------------------------------------------|---------|---------------|--------------|
| Author         | Razzak et al., 2020                                                                                                                                     |         |               |              |
| SOURCE OF DATA | Source of data (e.g., cohort, case-control, randomized trial participants, or registry data)                                                            | ✓       | ✓             | X            |
| PARTICIPANTS   | Participant eligibility and recruitment method (e.g., consecutive participants, location, number of centers, setting, inclusion and exclusion criteria) | ✓       | ✓             | X            |
|                | Participant description                                                                                                                                 | ✓       | ✓             | X            |
|                | Details of treatments received, if relevant                                                                                                             | X       | X             | X            |

|                                              |                                                                                                                                        |   |   |   |
|----------------------------------------------|----------------------------------------------------------------------------------------------------------------------------------------|---|---|---|
|                                              | Study dates                                                                                                                            | ✓ | ✓ | X |
| <b>OUTCOME(S) TO BE PREDICTED</b>            | Definition and method for measurement of outcome                                                                                       | ✓ | ✓ | X |
|                                              | Was the same outcome definition (and method for measurement) used in all patients?                                                     | ✓ | ✓ | X |
|                                              | Type of outcome (e.g., single or combined endpoints)                                                                                   | ✓ | ✓ | X |
|                                              | Was the outcome assessed without knowledge of the candidate predictors (i.e., blinded)?                                                | ✓ | ✓ | X |
|                                              | Were candidate predictors part of the outcome (e.g., in panel or consensus diagnosis)?                                                 | X | X | X |
|                                              | Time of outcome occurrence or summary of duration of follow-up                                                                         | X | X | X |
| <b>CANDIDATE PREDICTORS (OR INDEX TESTS)</b> | Number and type of predictors (e.g., demographics, patient history, physical examination, additional testing, disease characteristics) | ✓ | ✓ | X |
|                                              | Definition and method for measurement of candidate predictors                                                                          | ✓ | ✓ | X |
|                                              | Timing of predictor measurement (e.g., at patient presentation, at diagnosis, at treatment initiation)                                 | ✓ | ✓ | X |
|                                              | Were predictors assessed blinded for outcome, and for each other (if relevant)?                                                        | X | X | X |
|                                              | Handling of predictors in the modelling (e.g., continuous, linear, non-linear transformations or categorised)                          | ✓ | ✓ | X |
| <b>SAMPLE SIZE</b>                           | Number of participants and number of outcomes/events                                                                                   | ✓ | ✓ | X |
|                                              | Number of outcomes/events in relation to the number of candidate predictors (Events Per Variable)                                      | ✓ | ✓ | X |
| <b>MISSING DATA</b>                          | Number of participants with any missing value (include predictors and outcomes)                                                        | X | X | X |
|                                              | Number of participants with missing data for each predictor                                                                            | X | X | X |

|                          |                                                                                                                                                                                                                                                                   |   |   |   |
|--------------------------|-------------------------------------------------------------------------------------------------------------------------------------------------------------------------------------------------------------------------------------------------------------------|---|---|---|
|                          | Handling of missing data (e.g., complete-case analysis, imputation, or other methods)                                                                                                                                                                             | X | X | X |
| <b>MODEL DEVELOPMENT</b> | Modelling method (e.g., logistic, survival, neural network, or machine learning techniques)                                                                                                                                                                       | ✓ | ✓ | X |
|                          | Modelling assumptions satisfied                                                                                                                                                                                                                                   | ✓ | ✓ | X |
|                          | Method for selection of predictors <b>for inclusion</b> in multivariable modelling (e.g., all candidate predictors, pre-selection based on unadjusted association with the outcome)                                                                               | ✓ | ✓ | X |
|                          | Method for selection of predictors <b>during multivariable modelling</b> (e.g., full model approach, backward or forward selection) and criteria used (e.g., p-value, Akaike Information Criterion)                                                               | ✓ | ✓ | X |
|                          | Shrinkage of predictor weights or regression coefficients (e.g., no shrinkage, uniform shrinkage, penalized estimation)                                                                                                                                           | ✓ | ✓ | X |
| <b>MODEL PERFORMANCE</b> | Calibration (calibration plot, calibration slope, Hosmer-Lemeshow test) and Discrimination (C-statistic, D-statistic, log-rank) measures with confidence intervals                                                                                                | ✓ | ✓ | X |
|                          | Classification measures (e.g., sensitivity, specificity, predictive values, net reclassification improvement) and whether a-priori cut points were used                                                                                                           | X | X | X |
| <b>MODEL EVALUATION</b>  | Method used for testing model performance: development dataset only (random split of data, resampling methods e.g. bootstrap or cross-validation, none) or separate external validation (e.g. temporal, geographical, different setting, different investigators) | ✓ | ✓ | X |
|                          | In case of poor validation, whether model was adjusted or updated (e.g., intercept recalibrated, predictor effects adjusted, or new predictors added)                                                                                                             | ✓ | ✓ | X |

|                                      |                                                                                                                                                                                                                                                     |   |   |   |
|--------------------------------------|-----------------------------------------------------------------------------------------------------------------------------------------------------------------------------------------------------------------------------------------------------|---|---|---|
| <b>RESULTS</b>                       | Final and other multivariable models (e.g., basic, extended, simplified) presented, including predictor weights or regression coefficients, intercept, baseline survival, model performance measures (with standard errors or confidence intervals) | ✓ | ✓ | X |
|                                      | Any alternative presentation of the final prediction models, e.g., sum score, nomogram, score chart, predictions for specific risk subgroups with performance                                                                                       | X | X | X |
|                                      | Comparison of the distribution of predictors (including missing data) for development and validation datasets                                                                                                                                       | X | X | X |
| <b>INTERPRETATION AND DISCUSSION</b> | Interpretation of presented models (confirmatory, i.e., model useful for practice versus exploratory, i.e., more research needed)                                                                                                                   | ✓ | ✓ | X |
|                                      | Comparison with other studies, discussion of generalizability, strengths, and limitations.                                                                                                                                                          | ✓ | ✓ | X |

| Domain                            | Key items                                                                                                                                               | General | Applicability | Risk of Bias |
|-----------------------------------|---------------------------------------------------------------------------------------------------------------------------------------------------------|---------|---------------|--------------|
| <b>Author</b>                     | <b>McDermott et al., 2020</b>                                                                                                                           |         |               |              |
| <b>SOURCE OF DATA</b>             | Source of data (e.g., cohort, case-control, randomized trial participants, or registry data)                                                            | ✓       | ✓             | X            |
| <b>PARTICIPANTS</b>               | Participant eligibility and recruitment method (e.g., consecutive participants, location, number of centers, setting, inclusion and exclusion criteria) | X       | X             | X            |
|                                   | Participant description                                                                                                                                 | X       | X             | X            |
|                                   | Details of treatments received, if relevant                                                                                                             | X       | X             | X            |
|                                   | Study dates                                                                                                                                             | X       | X             | X            |
| <b>OUTCOME(S) TO BE PREDICTED</b> | Definition and method for measurement of outcome                                                                                                        | ✓       | ✓             | X            |
|                                   | Was the same outcome definition (and method for                                                                                                         | ✓       | ✓             | X            |

|                                                      |                                                                                                                                        |   |   |   |
|------------------------------------------------------|----------------------------------------------------------------------------------------------------------------------------------------|---|---|---|
|                                                      | measurement) used in all patients?                                                                                                     |   |   |   |
|                                                      | Type of outcome (e.g., single or combined endpoints)                                                                                   | ✓ | ✓ | X |
|                                                      | Was the outcome assessed without knowledge of the candidate predictors (i.e., blinded)?                                                | X | X | X |
|                                                      | Were candidate predictors part of the outcome (e.g., in panel or consensus diagnosis)?                                                 | X | X | X |
|                                                      | Time of outcome occurrence or summary of duration of follow-up                                                                         | X | X | X |
| <b>CANDIDATE<br/>PREDICTORS<br/>(OR INDEX TESTS)</b> | Number and type of predictors (e.g., demographics, patient history, physical examination, additional testing, disease characteristics) | X | X | X |
|                                                      | Definition and method for measurement of candidate predictors                                                                          | ✓ | ✓ | X |
|                                                      | Timing of predictor measurement (e.g., at patient presentation, at diagnosis, at treatment initiation)                                 | X | X | X |
|                                                      | Were predictors assessed blinded for outcome, and for each other (if relevant)?                                                        | X | X | X |
|                                                      | Handling of predictors in the modelling (e.g., continuous, linear, non-linear transformations or categorised)                          | ✓ | ✓ | X |
| <b>SAMPLE SIZE</b>                                   | Number of participants and number of outcomes/events                                                                                   | X | X | X |
|                                                      | Number of outcomes/events in relation to the number of candidate predictors (Events Per Variable)                                      | X | X | X |
| <b>MISSING DATA</b>                                  | Number of participants with any missing value (include predictors and outcomes)                                                        | X | X | X |
|                                                      | Number of participants with missing data for each predictor                                                                            | X | X | X |
|                                                      | Handling of missing data (e.g., complete-case analysis, imputation, or other methods)                                                  | X | X | X |
| <b>MODEL</b>                                         | Modelling method (e.g., logistic, survival, neural network, or machine learning techniques)                                            | ✓ | ✓ | X |



|                          |                                                                                                                                                                                                                                                                   |   |   |   |
|--------------------------|-------------------------------------------------------------------------------------------------------------------------------------------------------------------------------------------------------------------------------------------------------------------|---|---|---|
| <b>DEVELOPMENT</b>       | Modelling assumptions satisfied                                                                                                                                                                                                                                   | ✓ | X | X |
|                          | Method for selection of predictors <b>for inclusion</b> in multivariable modelling (e.g., all candidate predictors, pre-selection based on unadjusted association with the outcome)                                                                               | ✓ | ✓ | X |
|                          | Method for selection of predictors <b>during multivariable modelling</b> (e.g., full model approach, backward or forward selection) and criteria used (e.g., p-value, Akaike Information Criterion)                                                               | X | X | X |
|                          | Shrinkage of predictor weights or regression coefficients (e.g., no shrinkage, uniform shrinkage, penalized estimation)                                                                                                                                           | X | X | X |
| <b>MODEL PERFORMANCE</b> | Calibration (calibration plot, calibration slope, Hosmer-Lemeshow test) and Discrimination (C-statistic, D-statistic, log-rank) measures with confidence intervals                                                                                                | ✓ | ✓ | X |
|                          | Classification measures (e.g., sensitivity, specificity, predictive values, net reclassification improvement) and whether a-priori cut points were used                                                                                                           | X | X | X |
| <b>MODEL EVALUATION</b>  | Method used for testing model performance: development dataset only (random split of data, resampling methods e.g. bootstrap or cross-validation, none) or separate external validation (e.g. temporal, geographical, different setting, different investigators) | ✓ | ✓ | X |
|                          | In case of poor validation, whether model was adjusted or updated (e.g., intercept recalibrated, predictor effects adjusted, or new predictors added)                                                                                                             | X | X | X |
| <b>RESULTS</b>           | Final and other multivariable models (e.g., basic, extended, simplified) presented, including predictor weights or regression coefficients, intercept, baseline survival, model performance measures (with standard errors or confidence intervals)               | X | X | X |

|                                      |                                                                                                                                                               |   |   |   |
|--------------------------------------|---------------------------------------------------------------------------------------------------------------------------------------------------------------|---|---|---|
|                                      | Any alternative presentation of the final prediction models, e.g., sum score, nomogram, score chart, predictions for specific risk subgroups with performance | ✓ | ✓ | X |
|                                      | Comparison of the distribution of predictors (including missing data) for development and validation datasets                                                 | X | X | X |
| <b>INTERPRETATION AND DISCUSSION</b> | Interpretation of presented models (confirmatory, i.e., model useful for practice versus exploratory, i.e., more research needed)                             | ✓ | ✓ | X |
|                                      | Comparison with other studies, discussion of generalizability, strengths, and limitations.                                                                    | ✓ | ✓ | X |

| Domain                            | Key items                                                                                                                                               | General | Applicability | Risk of Bias |
|-----------------------------------|---------------------------------------------------------------------------------------------------------------------------------------------------------|---------|---------------|--------------|
| <b>Author</b>                     | See et al., 2020                                                                                                                                        |         |               |              |
| <b>SOURCE OF DATA</b>             | Source of data (e.g., cohort, case-control, randomized trial participants, or registry data)                                                            | X       | X             | X            |
| <b>PARTICIPANTS</b>               | Participant eligibility and recruitment method (e.g., consecutive participants, location, number of centers, setting, inclusion and exclusion criteria) | X       | X             | X            |
|                                   | Participant description                                                                                                                                 | ✓       | ✓             | X            |
|                                   | Details of treatments received, if relevant                                                                                                             | ✓       | ✓             | X            |
|                                   | Study dates                                                                                                                                             | X       | X             | X            |
| <b>OUTCOME(S) TO BE PREDICTED</b> | Definition and method for measurement of outcome                                                                                                        | ✓       | ✓             | X            |
|                                   | Was the same outcome definition (and method for measurement) used in all patients?                                                                      | X       | X             | X            |
|                                   | Type of outcome (e.g., single or combined endpoints)                                                                                                    | X       | X             | X            |
|                                   | Was the outcome assessed without knowledge of the                                                                                                       | X       | X             | X            |

|                                                      |                                                                                                                                        |   |   |   |
|------------------------------------------------------|----------------------------------------------------------------------------------------------------------------------------------------|---|---|---|
|                                                      | candidate predictors (i.e., blinded)?                                                                                                  |   |   |   |
|                                                      | Were candidate predictors part of the outcome (e.g., in panel or consensus diagnosis)?                                                 | X | X | X |
|                                                      | Time of outcome occurrence or summary of duration of follow-up                                                                         | X | X | X |
| <b>CANDIDATE<br/>PREDICTORS<br/>(OR INDEX TESTS)</b> | Number and type of predictors (e.g., demographics, patient history, physical examination, additional testing, disease characteristics) | ✓ | ✓ | X |
|                                                      | Definition and method for measurement of candidate predictors                                                                          | ✓ | ✓ | X |
|                                                      | Timing of predictor measurement (e.g., at patient presentation, at diagnosis, at treatment initiation)                                 | X | X | X |
|                                                      | Were predictors assessed blinded for outcome, and for each other (if relevant)?                                                        | X | X | X |
|                                                      | Handling of predictors in the modelling (e.g., continuous, linear, non-linear transformations or categorised)                          | X | X | X |
| <b>SAMPLE SIZE</b>                                   | Number of participants and number of outcomes/events                                                                                   | X | X | X |
|                                                      | Number of outcomes/events in relation to the number of candidate predictors (Events Per Variable)                                      | X | X | X |
| <b>MISSING DATA</b>                                  | Number of participants with any missing value (include predictors and outcomes)                                                        | X | X | X |
|                                                      | Number of participants with missing data for each predictor                                                                            | X | X | X |
|                                                      | Handling of missing data (e.g., complete-case analysis, imputation, or other methods)                                                  | X | X | X |
| <b>MODEL<br/>DEVELOPMENT</b>                         | Modelling method (e.g., logistic, survival, neural network, or machine learning techniques)                                            | ✓ | ✓ | X |
|                                                      | Modelling assumptions satisfied                                                                                                        | X | X | X |
|                                                      | Method for selection of predictors <b>for inclusion</b> in multivariable modelling (e.g., all candidate predictors,                    | X | X | X |

|                          |                                                                                                                                                                                                                                                                   |   |   |   |
|--------------------------|-------------------------------------------------------------------------------------------------------------------------------------------------------------------------------------------------------------------------------------------------------------------|---|---|---|
|                          | pre-selection based on unadjusted association with the outcome)                                                                                                                                                                                                   |   |   |   |
|                          | Method for selection of predictors <b>during multivariable modelling</b> (e.g., full model approach, backward or forward selection) and criteria used (e.g., p-value, Akaike Information Criterion)                                                               | X | X | X |
|                          | Shrinkage of predictor weights or regression coefficients (e.g., no shrinkage, uniform shrinkage, penalized estimation)                                                                                                                                           | X | X | X |
| <b>MODEL PERFORMANCE</b> | Calibration (calibration plot, calibration slope, Hosmer-Lemeshow test) and Discrimination (C-statistic, D-statistic, log-rank) measures with confidence intervals                                                                                                | X | X | X |
|                          | Classification measures (e.g., sensitivity, specificity, predictive values, net reclassification improvement) and whether a-priori cut points were used                                                                                                           | ✓ | ✓ | X |
| <b>MODEL EVALUATION</b>  | Method used for testing model performance: development dataset only (random split of data, resampling methods e.g. bootstrap or cross-validation, none) or separate external validation (e.g. temporal, geographical, different setting, different investigators) | X | X | X |
|                          | In case of poor validation, whether model was adjusted or updated (e.g., intercept recalibrated, predictor effects adjusted, or new predictors added)                                                                                                             | X | X | X |
| <b>RESULTS</b>           | Final and other multivariable models (e.g., basic, extended, simplified) presented, including predictor weights or regression coefficients, intercept, baseline survival, model performance measures (with standard errors or confidence intervals)               | X | X | X |
|                          | Any alternative presentation of the final prediction models, e.g., sum score, nomogram, score chart, predictions for specific risk subgroups with performance                                                                                                     | ✓ | ✓ | X |

|                                  |                                                                                                                                   |   |   |   |
|----------------------------------|-----------------------------------------------------------------------------------------------------------------------------------|---|---|---|
|                                  | Comparison of the distribution of predictors (including missing data) for development and validation datasets                     | X | X | X |
| INTERPRETATION<br>AND DISCUSSION | Interpretation of presented models (confirmatory, i.e., model useful for practice versus exploratory, i.e., more research needed) | ✓ | ✓ | X |
|                                  | Comparison with other studies, discussion of generalizability, strengths, and limitations.                                        | ✓ | ✓ | X |
