# Supplementary material for: COVID-19 Prevention and Control Measures in Workplace Settings: A Rapid Review and Meta-Analysis
Source: MDPI journal article supplement (doi:10.3390/ijerph18157847), 2021-07-24
Supplement: s1 [file s1]

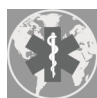

**Supplemental Table S1.** Quality assessment checklist for included longitudinal studies (n=49).

| Author                          | Design                                                     | Experi-<br>men-<br>tal<br>(Y/<br>N) | Complete<br>Denom-<br>inator<br>(Y/N) | PCR                                       | Follow<br>Up<br>Time | Over-<br>all<br>Sc<br>ore |
|---------------------------------|------------------------------------------------------------|-------------------------------------|---------------------------------------|-------------------------------------------|----------------------|---------------------------|
|                                 |                                                            |                                     |                                       | Tes-<br>tin<br>g<br>Use<br>d<br>(Y/<br>N) |                      |                           |
| Lentz et al., 2020              | Case-control study                                         | N                                   | Y                                     | N                                         | N                    | 1                         |
| Roxby et al., 2020              | Case-series Study                                          | N                                   | Y                                     | Y                                         | N                    | 1                         |
| Kong et al., 2020               | Cohort Study                                               | N                                   | Y                                     | N                                         | Y                    | 2                         |
| Miller et al., 2020             | Cohort Study                                               | N                                   | Y                                     | N                                         | N                    | 1                         |
| Mandić-Rajčević et al.,<br>2020 | Epidemiological ob-<br>servational study                   | N                                   | Y                                     | Y                                         | Y                    | 3                         |
| Lipsitz et al., 2020            | Longitudinal Cohort<br>Study                               | N                                   | Y                                     | N                                         | Y                    | 2                         |
| Reyné et al., 2020              | Observational Retro-<br>spective Study                     | N                                   | Y                                     | Y                                         | N                    | 2                         |
| Krone et al., 2021              | Observational Study                                        | N                                   | Y                                     | Y                                         | N                    | 2                         |
| Wee et al., 2020                | Observational Study                                        | N                                   | Y                                     | Y                                         | Y                    | 3                         |
| LEI Wee et al., 2020            | Observational Study                                        | N                                   | Y                                     | Y                                         | Y                    | 3                         |
| Kabesch et al., 2020            | Outbreak Investigation<br>Report                           | N                                   | N                                     | Y                                         | Y                    | 2                         |
| Knoll et al., 2020              | Outbreak Investigation<br>Report                           | N                                   | Y                                     | Y                                         | Y                    | 3                         |
| MacIntyre et al., 2020          | Post-hoc Analysis of a<br>randomized con-<br>trolled trial | Y                                   | Y                                     | N                                         | Y                    | 3                         |
| Dubey et al., 2020              | Prospective Cohort<br>Study                                | N                                   | Y                                     | Y                                         | N                    | 2                         |
| Benea et al., 2020              | Prospective Cohort<br>Study                                | N                                   | Y                                     | Y                                         | Y                    | 3                         |
| Chang et al., 2020              | Prospective Cohort<br>Study                                | N                                   | Y                                     | Y                                         | Y                    | 3                         |
| Chung et al., 2020              | Prospective cohort<br>study                                | N                                   | Y                                     | Y                                         | N                    | 2                         |
| Jones et al., 2020              | Prospective Cohort<br>Study                                | N                                   | Y                                     | Y                                         | Y                    | 3                         |
| Karmarkar et al., 2020          | Prospective Cohort<br>Study                                | N                                   | Y                                     | Y                                         | Y                    | 3                         |
| Mortgat et al., 2020            | Prospective Cohort<br>Study                                | N                                   | Y                                     | Y                                         | N                    | 2                         |
| Luigi et al., 2020              | Prospective Cohort<br>Study                                | N                                   | Y                                     | N                                         | Y                    | 2                         |

| Author                   | Design                                        | Experi-<br>men-<br>tal<br>(Y/<br>N) | Complete<br>Denom-<br>inator<br>(Y/N) | PCR<br>Tes-<br>tin-<br>g<br>Use<br>d<br>(Y/<br>N) | Follow<br>Up<br>Ti-<br>me | Over-<br>all<br>Sc-<br>ore |
|--------------------------|-----------------------------------------------|-------------------------------------|---------------------------------------|---------------------------------------------------|---------------------------|----------------------------|
| Menting et al., 2021     | Prospective Cohort Study                      | N                                   | Y                                     | Y                                                 | Y                         | 3                          |
| Rivett et al., 2020      | Prospective Cohort Study                      | N                                   | Y                                     | Y                                                 | Y                         | 3                          |
| Mohanty et al., 2020     | Prospective Cohort Study                      | N                                   | Y                                     | N                                                 | Y                         | 2                          |
| Seidelman et al., 2020   | Prospective Cohort Study                      | N                                   | N                                     | N                                                 | Y                         | 1                          |
| Squeri et al., 2020      | Prospective Cohort Study                      | N                                   | Y                                     | N                                                 | N                         | 1                          |
| Suzuki et al., 2021      | Prospective Cohort Study                      | N                                   | Y                                     | N                                                 | N                         | 1                          |
| Wee et al., 2020         | Prospective Cohort Study                      | N                                   | Y                                     | Y                                                 | Y                         | 3                          |
| Woon et al., 2020        | Prospective Cohort Study                      | N                                   | Y                                     | Y                                                 | N                         | 2                          |
| Wang DD et al., 2021     | Prospective Cohort Study                      | N                                   | Y                                     | Y                                                 | Y                         | 3                          |
| Brehm et al., 2020       | Prospective longitudinal seroconversion study | N                                   | Y                                     | Y                                                 | Y                         | 3                          |
| Cattelan et al., 2020    | Prospective Observational Study               | N                                   | Y                                     | Y                                                 | Y                         | 3                          |
| Kumar 2020               | Prospective observational study               | N                                   | Y                                     | Y                                                 | Y                         | 3                          |
| Eyre et al., 2020        | Prospective Observational Study               | N                                   | Y                                     | Y                                                 | Y                         | 3                          |
| Erber et al., 2020       | Prospective seroprevalence study              | N                                   | Y                                     | Y                                                 | Y                         | 3                          |
| Gunawardana et al., 2020 | Prospective, longitudinal, observational      | N                                   | Y                                     | Y                                                 | N                         | 2                          |
| Huy et al., 2020         | Prospective Descriptive Study                 | N                                   | Y                                     | Y                                                 | N                         | 2                          |
| Sanchez et al., 2020     | Report                                        | N                                   | Y                                     | Y                                                 | Y                         | 3                          |
| Brainard et al., 2020    | Retrospective Cohort Study                    | N                                   | Y                                     | N                                                 | Y                         | 2                          |
| Canetti et al., 2020     | Retrospective Cohort Study                    | N                                   | Y                                     | Y                                                 | N                         | 2                          |
| Kim et al., 2020         | Retrospective Cohort Study                    | N                                   | Y                                     | Y                                                 | N                         | 2                          |
| Ladhani et al., 2020     | Retrospective Cohort Study                    | N                                   | Y                                     | Y                                                 | N                         | 2                          |
| Wang et al., 2020        | Retrospective Cohort Study                    | N                                   | Y                                     | Y                                                 | Y                         | 3                          |

| Author                | Design                       | Experi-<br>men-<br>tal<br>(Y/<br>N) | Complete<br>Denom-<br>inator<br>(Y/N) | PCR                               | Follow<br>Up<br>Time | Over-<br>all<br>Score |
|-----------------------|------------------------------|-------------------------------------|---------------------------------------|-----------------------------------|----------------------|-----------------------|
|                       |                              |                                     |                                       | Test-<br>ing<br>Used<br>(Y/<br>N) |                      |                       |
| Herstein et al., 2021 | Retrospective Cohort Study   | N                                   | Y                                     | N                                 | N                    | 1                     |
| Tripathy et al., 2020 | Retrospective Cohort Study   | N                                   | Y                                     | Y                                 | Y                    | 3                     |
| Rolland et al., 2020  | Short Term Prospective Study | N                                   | Y                                     | Y                                 | N                    | 2                     |
| ChiChen et al., 2020  | Surveillance Study           | N                                   | Y                                     | Y                                 | Y                    | 3                     |
| Porru et al., 2020    | Surveillance Study           | N                                   | Y                                     | Y                                 | Y                    | 3                     |
