# Supplementary material for: COVID-19 Prevention and Control Measures in Workplace Settings: A Rapid Review and Meta-Analysis
Source: Int J Environ Res Public Health. 2021 Jul 24;18(15):7847. doi: 10.3390/ijerph18157847 (PMC8345343; doi:10.3390/ijerph18157847)
Supplement: Supplementary file 1 [file ijerph-18-07847-s001.zip › Supplemental Sheet 1.xlsx]

## Sheet: Asymptomatic RT-PCR testing
Study	Quality	Study Reference	Country	Country_code	Region	Study_type	Setting	Population	Employees_Only	Int_Cat	Intervention	Int_name	Outcome_type	Outcome	n	N	Start	End	Duration	Asymp_If_Combined	Com_Trans_Raw	Com_Trans_Group	Com_Trans_Cat	Com_Trans_CatII	Pandemic_wave_interval
Kumar 2020	3	60	Canada	CAN	North America	Prospective cohort	Healthcare	HCWs	y	Surveillance	S	Asymptomatic PCR testing via OSH department	Positivity rate (%)	0.49	20	4107	2020-04-17	2020-05-29	42	NA	3.6-12.2	5 to 10	High	Over 5	Acceleration
Porru 2020	3	70	Italy	ITA	Europe	Prospective cohort	Healthcare	HCWs	y	Outbreak investigation, Surveillance	S	Mass screening, no contact tracing	Positivity rate (%)	0.7	26	3819	2020-02-01	2020-04-01	60	Y	22.2	Over 10	Very high	Over 5	Peak
Mortgat 2020	2	37	Belgium	BEL	Europe	Prospective cohort	Healthcare	HCWs	y	Surveillance	S	Asymptomatic PCR testing		1.1	8	699	2020-04-22	2020-04-26	4	NA	9.4	5 to 10	High	Over 5	Deceleration
Jones 2020	3	33	United Kingdom	GBR	Europe	Prospective cohort	Healthcare	HCWs	y	Surveillance	S	Systematic RT-PCR testing	Positivity rate (%)	1.4	51	3644	2020-04-25	2020-05-24	29	NA	2.7-23.7	Over 10	Very high	Over 5	Deceleration
Chang 2020	3	28	Korea	KOR	Asia	Prospective cohort	Healthcare	HCWs	y	Surveillance	S	Universal screening in ICU	Positivity rate (%)	2.3	2	86	2020-02-28	2020-04-17	49	NA	0.4-3.6	1 to 5	Moderate	Under 5	Deceleration
Eyre 2020	3	71	United Kingdom	GBR	Europe	Prospective observational	Healthcare	HCWs	y	Surveillance	S	Asymptomatic PCR testing	Positivity rate (%)	2.9	288	9926	2020-03-01	2020-06-01	46	NA	1.7-30	Over 10	Very high	Over 5	Peak
Rivett 2020	3	38	United Kingdom	GBR	Europe	Prospective cohort	Healthcare	HCWs	y	Surveillance	S	Asymptomatic PCR testing	Positivity rate (%)	3	30	1032	2020-04-01	2020-04-01	21	NA	19.8	Over 10	Very high	Over 5	Peak
Gunawardana 2020	2	47	USA	USA	North America	Clinical study	Office	Employees, Households	y	Surveillance	S	General PCR testing	Positivity rate (%)	3.7	2	54	2020-03-23	2020-06-15	90	NA	4.6-8.8	5 to 10	Moderate	Under 5	Peak
Mohanty 2020	2	36	USA	USA	North America	Prospective cohort	Healthcare	HCWs	y	Surveillance	S	Universal asymptomatic testing		3.8	64	1670	2020-04-01	2020-06-01	90	NA	12.5	Over 10	Very high	Over 5	Deceleration
Canetti 2020	2	54	Italy	ITA	Europe	Retrospective cohort	Healthcare	HCWs	y	Surveillance	S	RT- PCR - asymptomatic HCWs	Positivity rate (%)	5	2	40	2020-03-01	2020-04-01	60	NA	26.8	Over 10	Very high	Over 5	Acceleration

## Sheet: Universal Masking
Study	Quality	Study Reference	Country	Country_code	Region	Study_type	Setting	SettingII	Population	Employees_Only	Int_Cat	Intervention	Int_name	Outcome_type	Outcome	n	N	Start	End	Duration	Asymp_If_Combined	Com_Trans_Raw	Com_Trans_Group	Com_Trans_Cat	Com_Trans_CatII	Pandemic_wave_interval	Pandemic_wave_intervalII
Wang 2020	3	52	USA	USA	North America	Retrospective cohort	Healthcare		HCWs	y	PPE	S	Universal masking - Baseline	Positivity rate (%)	11.4619	1129	9850	2020-04-11	2020-04-30	19	NA		Over 10	Very high		Acceleration
Wang 2021	3	43	USA	USA	North America	Prospective cohort	Healthcare		HCWs	y	PPE	S	Universal face mask policy for healthcare workers	Positivity rate (%)	39.5311	725	1834	2020-03-12	2020-03-26	53	NA

## Sheet: Contact tracing and surveillanc
Study	Quality Score	Study Reference	Country	Country_code	Region	Study_type	Setting	SettingII	Population	Employees_Only	Int_Cat	Intervention	Int_name	Outcome_type	Outcome	n	N	Start	End	Duration	Asymp_If_Combined	Com_Trans_Raw	Com_Trans_Group	Com_Trans_Cat	Pandemic_wave_interval
Chung - Contact Tracing (CT)	2	29	Korea	KOR	Asia	Prospective cohort	Healthcare		HCWs	y	Outbreak investigation	S	Contact tracing	Positivity rate (%)	0	0	317	2020-01-01	2020-09-01	270	NA	4.7	1 to 5	Moderate	Peak
Chi Chen- Synd. Surv., Out. Inv.	3	69	Taiwan	TWN	Asia	Prospective observational	Healthcare	Healthcare	HCWs	y	Outbreak investigation, Surveillance	C	Reporting of symptomatic HCWs, ongoing surveillance to identify contagion exposure, outbreak investigations	Positivity rate (%)	0	0	128	2020-01-19	2020-05-16	119	N	2.2	1 to 5	Moderate	Full Pandemic Wave
Wee 2020b - Synd. Surv., Out. Inv.	3	45	Singapore	SGP	Asia	Prospective cohort	Healthcare	Healthcare	HCWs	y	Outbreak investigation, Surveillance	C	Syndromic surveillance, outbreak investigation and management	Positivity rate (%)	0.54	9	1642	2020-01-01	2020-04-22	112	N	8-22.4	Over 10	Very high	Acceleration
WeeLEI - CT, Synd. Surv	3	61	Singapore	SGP	Asia	Prospective cohort	Healthcare	Healthcare	HCWs	y	Outbreak investigation, Surveillance	C	Contact tracing; 14-day phone surveillance; 28-day follow up of close contacts	Positivity rate (%)	1.2	3	253	2020-02-07	2020-05-07	90	N	20.8	Over 10	Very high	Acceleration
Jones - CT, Symp. Testing	3	33	United Kingdom	GBR	Europe	Prospective cohort	Healthcare		HCWs	y	Surveillance	S	Symptomatic testing of household contacts	Positivity rate (%)	1.9	5	267	2020-04-25	2020-05-24	29	NA	2.7-23.7	Over 10	Very high	Deceleration
Rivett - CT, Symp. Testing	3	38	United Kingdom	GBR	Europe	Prospective cohort	Healthcare		HCWs	y	Surveillance	S	Symptomatic testing of household contacts	Positivity rate (%)	7.7	4	52	2020-04-01	2020-04-01	21	NA	19.8	Over 10	Very high	Peak
Porru - Mass screening, CT	3	70	Italy	ITA	Europe	Prospective cohort	Healthcare		HCWs	y	Outbreak investigation, Surveillance	C	Mass screening, contact tracing	Positivity rate (%)	10	212	2123	2020-02-01	2020-04-01	60	Y	22.2	Over 10	Very high	Peak
Rajčević -CT, Close contact testing	3	57	Italy	ITA	Europe	Prospective observational	Healthcare		HCWs	y	Outbreak investigation, Surveillance	C	Contact tracing, testing of close contacts	Positivity rate (%)	10	173	1730	2020-03-09	2020-04-08	41	N	10.9-23.4	Over 10	Very high	Deceleration
Tripathy - Patient triage, HCW CT	3	51	South Korea		Asia	Retrospective cohort	Healthcare		HCWs	y	Outbreak investigations, Surveillance	C	Asymptomatic point-of-care rapid antigen test (PoC-RAT) before commencement of elective surgeries, contact tracing of exposed HCWs, back-to-work policiy for exposed HCWs with a negative PoC-RAT test	Positivity rate (%)	17.2414	15	87	2020-07-24	2020-09-12	50	Y

## Sheet: Combined measures
Study	Study Reference	Country	Country_code	Region	Study_type	Setting	SettingII	Population	Employees_Only	Int_Cat	Int_Ab	Intervention	Int_name	Outcome_type	Outcome	n	N	Start	End	Duration	Asymp_If_Combined	Com_Trans_Raw	Com_Trans_Group	Com_Trans_Cat	Com_Trans_CatII	Pandemic_wave_interval	Pandemic_wave_intervalII	Quality	Zoning	Training	Pre_testing	Env_Cleaning	PPE	Syn_Surv	Symp_Testing	Inventory_monitoring	Social_distance	Asymp_Test	Contact_tracing	Entry_restrictions	Total
Benea 2020	27	Canada	CAN	North America	Prospective cohort	Healthcare	Healthcare	HCWs	y	Changes in work arrangements, Surveillance	CWA, SURV	Combined	Home-based 7-day infection control strategy for exposed HCWs - asymptomatic, symptomatic RT-PCR testing	Positivity rate (%)	0	0	30	2020-05-18	2020-08-24	98	Y	3.6-0.8	1 to 5	Moderate	Under 5	Deceleration	Deceleration	3	n	n	n	n	n	n	y	n	n	y	n	n	2
Cattelan 2020	59	Italy	ITA	Europe	Prospective observational	Healthcare	Healthcare	HCWs	y	Changes in work arrangements, Surveillance	CWA, SURV	Combined	Integrated infection control strategy: zoning, PPE, mass surveillance	Positivity rate (%)	0	0	60				N	7.8-9	5 to 10	High	Over 5	Peak	Peak	3	y	n	n	n	y	y	n	n	n	y	n	n	4
Chi Chen 2020	69	Taiwan	TWN	Asia	Prospective observational	Healthcare	Healthcare	HCWs	y	Outbreak investigation, Surveillance	OI, SURV	Combined	Reporting of symptomatic HCWs, ongoing surveillance to identify contagion exposure, outbreak investigations	Positivity rate (%)	0	0	128	2020-01-19	2020-05-16	119	N	2.2	1 to 5	Moderate	Under 5	Full Pandemic Wave	Peak	3	n	n	n	n	n	y	n	n	n	n	y	n	2
Huy 2020	32	Vietnam	VNM	Asia	Prospective cohort	Laboratory	Healthcare	Employees	y	Changes in work arrangements, Education, Surveillance	CWA, SURV	Combined	Standard operating procedure, staff training, COVID-19 symptom reporting, enhanced cleaning, inventory monitoring protocols	Positivity rate (%)	0	0	32	2020-02-01	2020-09-17	229	N	0-1.6	0 to 1	Low	Under 5	Full Pandemic Wave	Peak	2	n	y	n	y	y	y	n	y	n	n	n	n	5
Woon 2020	44	Malaysia	MYS	Asia	Prospective cohort	Healthcare	Healthcare	HCWs	y	PPE, Surveillance	PPE, SURV	Combined	Adherence to PPE guidelines and hand hygiene practices, Asymptomatic anti-SARS-CoV-2 antibodies testing	Positivity rate (%)	0	0	400	2020-04-13	2020-05-12	29	Y	0	0 to 1	Low	Under 5	Recognition	Acceleration	2	n	n	n	y	y	y	y	n	n	n	y	n	5
Kong 2020	46	China	CHN	Asia	Prospective cohort	Healthcare	Healthcare	Patients	n	Changes in work arrangements, Education, PPE, Surveillance	CWA, ED, PPE, SURV	Combined	Hospital layout adjustments, specialized training, pre-testing - and triage, environmental cleansing, PPE	Positivity rate (%)	0.12	3	2855	2020-02-28	2020-05-28	90	N	0.1	0 to 1	Low	Under 5	Full Pandemic Wave	Peak	2	y	y	y	y	y	n	n	n	y	y	n	y	8
Wee 2020a	58	Singapore	SGP	Asia	Prospective cohort	Healthcare	Healthcare	HCWs	y	Changes in work arrangements, PPE, Surveillance	CWA, PPE, SURV	Combined	Social distancing, universal masking, testing of all symptomatic patients	Positivity rate (%)	0.13	17	13066	2020-01-01	2020-06-01	181	N	22	Over 10	Very high	Over 5	Full Pandemic Wave	Peak	3	n	n	n	n	y	y	y	n	y	n	n	n	4
Bontadi 2020	20	Italy	ITA	Europe	Cross-sectional	Manufacturing	Manufacturing	Employees	y	Changes in work behaviour, Education, Environmental adjustments,PPE	CWA, ED, ENV, PPE	Combined	Regulation of access to the company, social distancing, hygiene and PPE, cleaning and sanitizing of environments, worker education	Positivity rate (%)	0.3	4	1267	2020-04-11	2020-04-29	18	N	4.1-9	5 to 10	High	Over 5	Deceleration	Deceleration	1	n	y	n	y	y	n	n	n	y	n	n	y	5
Vimercati 2020	42	Italy	ITA	Europe	Observational longitudinal cohort	Healthcare	Healthcare	HCWs	y	Education, PPE, Outbreak investigation, Surveillance	ED, PPE, OI, SURV	Combined	Contact tracing, reinforced hygiene practices, PPE, Education and signage	Positivity rate (%)	0.4	23	5750	2020-02-21	2020-03-22	30	N	22	Over 10	Very high	Over 5	Acceleration	Acceleration	2	n	y	n	n	y	n	n	n	n	n	y	n	3
Kim 2020	53	Korea	KOR	Asia	Retrospective cohort	Healthcare	Healthcare	HCWs, Patients	n	Changes in work arrangements, Surveillance	CWA, SURV	Combined	Hospital shut down, Universal testing of all inpatients, medical staff, and employees	Positivity rate (%)	0.41	12	2924	2020-02-17	2020-02-28	7	N	0.1-3.8	1 to 5	Moderate	Under 5	Peak	Peak	2	n	n	y	n	n	n	n	n	n	y	n	y	3
Squeri 2020	40	Italy	ITA	Europe	Prospective cohort	Healthcare	Healthcare	HCWs	y	PPE, Outbreak investigation, Surveillance	PPE, OI, SURV	Combined	PPE and sanitation guidelines implemented, epidemiological investigation and contact tracing of high-risk HCWs, symptomatic swab testing	Positivity rate (%)	0.65	17	2611	2020-03-09	2020-06-19	102	N	0.5-22.2	Over 10	Very high	Over 5	Full Pandemic Wave	Peak	1	y	n	n	n	n	n	n	n	n	y	n	n	2
Brehm 2020	67	Germany	DEU	Europe	Retrospective cohort	Healthcare	Healthcare	HCWs	y	Changes in work arrangements, PPE, Surveillance	CWA, PPE, SURV	Combined	PPE, visitor restrictions, universal face masks, universal RT-PCR patient admission screening	Positivity rate (%)	0.89	11	1253	2020-03-20	2020-07-24	50	Y	0.6-9.8	5 to 10	Moderate	Over 5	Full Pandemic Wave	Peak	3	n	n	y	n	y	n	n	n	n	y	n	y	4
WeeLEI 2020	61	Singapore	SGP	Asia	Prospective cohort	Healthcare	Healthcare	HCWs	y	Outbreak investigation, Surveillance	OI, SURV	Combined	Contact tracing; 14-day phone surveillance; 28-day follow up of close contacts	Positivity rate (%)	1.2	3	253	2020-02-07	2020-05-07	90	N	20.8	Over 10	Very high	Over 5	Acceleration	Acceleration	3	n	n	n	n	n	y	n	n	n	n	y	n	2
Knoll 2020	64	Germany	DEU	Europe	Outbreak investigation	Healthcare	Healthcare	HCWs	y	Changes in work arrangements, PPE, Surveillance	CWA, PPE, SURV	Combined	Social distancing, surgical masks, systematic testing	Positivity rate (%)	1.9	8	432	2020-03-01	2020-04-27	30	Y	5-5.8	1 to 5	Moderate	Over 5	Peak	Peak	3	n	n	n	n	y	n	y	n	y	n	n	n	3
Krone 2020	56	Germany	DEU	Europe	Prospective cohort	Nursing home	Nursing home	CWs	y	Changes in work arrangements, Surveillance	CWA, SURV	Combined	General screening and cohort isolation	Positivity rate (%)	3	4	135	2020-03-01	2020-05-01	37	Y	9.3	5 to 10	Moderate	Over 5	Acceleration	Deceleration	2	y	n	n	n	n	n	n	n	n	y	n	n	2
